# Supplementary material for: One-step synthesized amphiphilic carbon dots for the super-resolution imaging of endoplasmic reticulum in live cells
Source: Royal Society of Chemistry journal article supplement (doi:10.1039/d2ra02705d), 2022-01-01
Supplement: d2ra02705d1.pdf [file d2ra02705d1.pdf]

## *Supporting Information*

# **One-step synthesized amphiphilic carbon dots for the super-resolution imaging of endoplasmic reticulum in live cells**

Jiajia Li<sup>a,‡</sup>, Longdi Zhang<sup>a,‡</sup>, Juan Chen<sup>a</sup>, Ruilong Zhang<sup>a</sup>, Zhengjie Liu<sup>a</sup>, Jun Zhao<sup>b</sup>,  
Bianhua Liu<sup>b</sup>, Ming-yong Han<sup>b</sup>, Guangmei Han<sup>a,\*</sup> and Zhongping Zhang<sup>a,b</sup>

<sup>a</sup> Information Materials and Intelligent Sensing Laboratory of Anhui Province, School of Chemistry and Chemical Engineering and Institutes of Physical Science and Information Technology, Anhui University, Hefei, 230601, P. R. China.

E-mail: gmhan@ahu.edu.cn

<sup>b</sup> Key Lab of Photovoltaic and Energy Conservation Materials, Institute of Solid State Physics, HFIPS, Chinese Academy of Sciences, Hefei, 230031, P. R. China

‡ These authors contributed equally to this work.

\* Corresponding author.

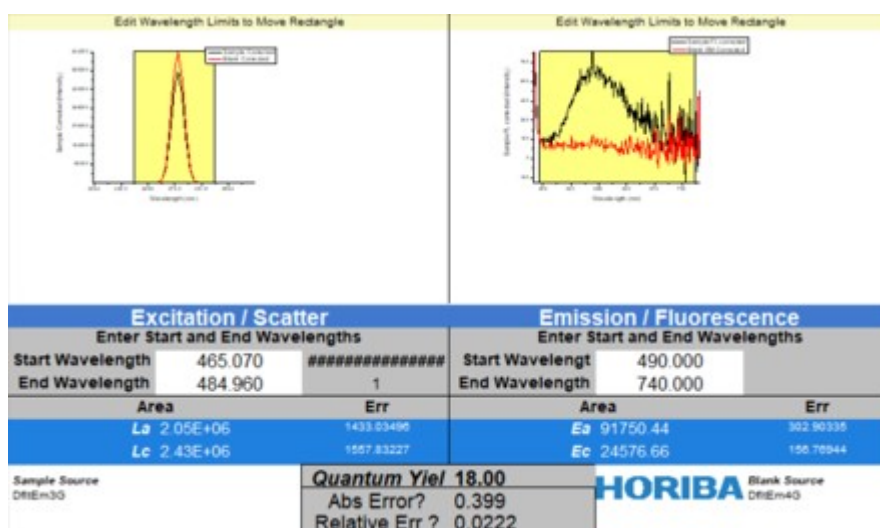

Fig. S1 The absolute fluorescence quantum yield of the Phe-CDs ( $\lambda_{ex} = 470$  nm).

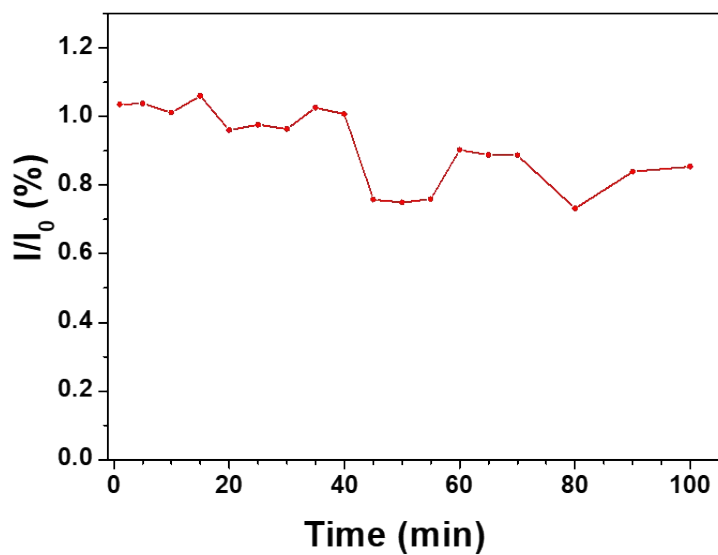

Fig. S2 FL stability of Phe-CDs under 365 nm UV light irradiation.

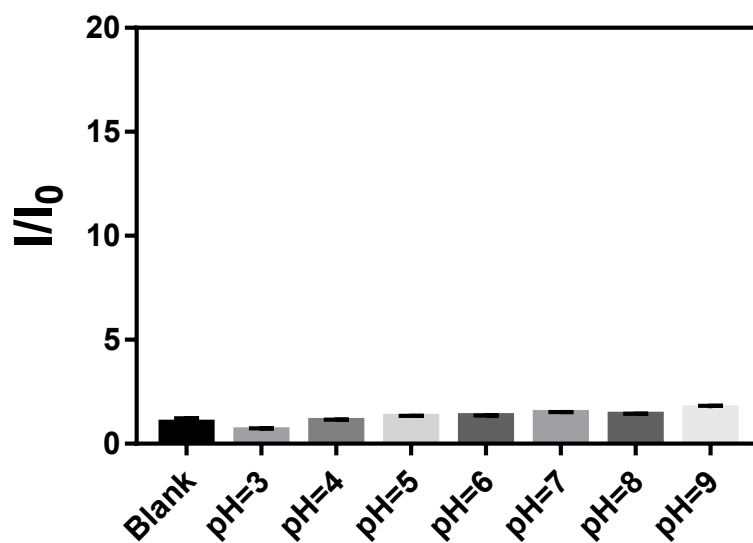

**Fig. S3** The effects of pH (3~9) on the fluorescence intensity of Phe-CDs.

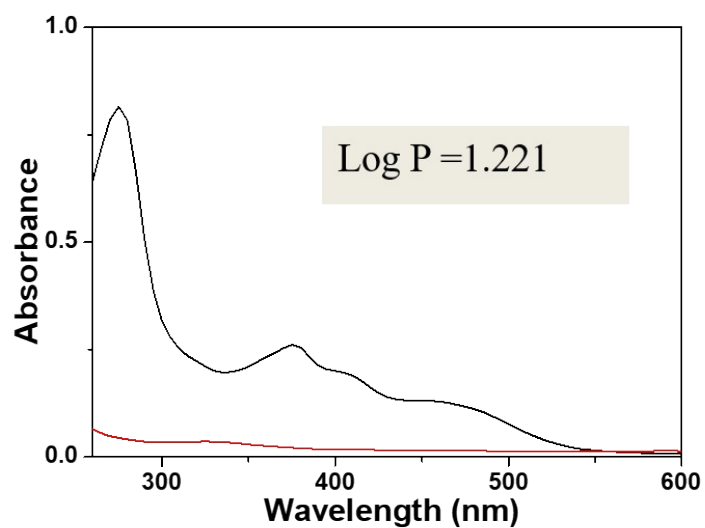

**Fig. S4** UV-vis spectra of Phe-CDs in water (red line) and octanol (black line). Phe-CDs (10 mg) was dissolved into 5 mL octanol, and then 5 mL water was further added. After 24 h, the two phases were individually diluted 20 folds, and their UV spectra were measured.

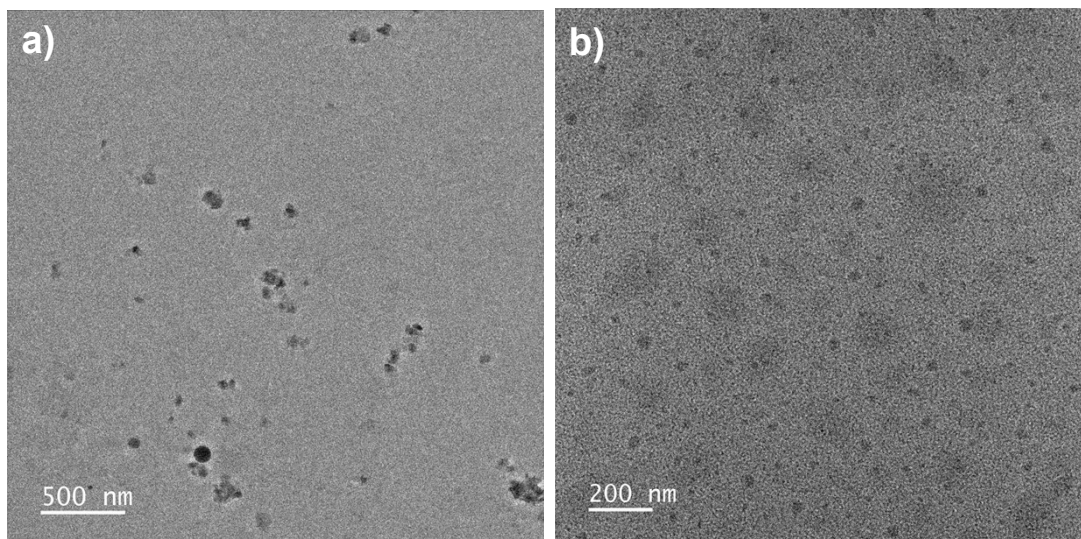

**Fig. S5** TEM images of Phe-CDs after mixing with a) glycerol and b) liposome.

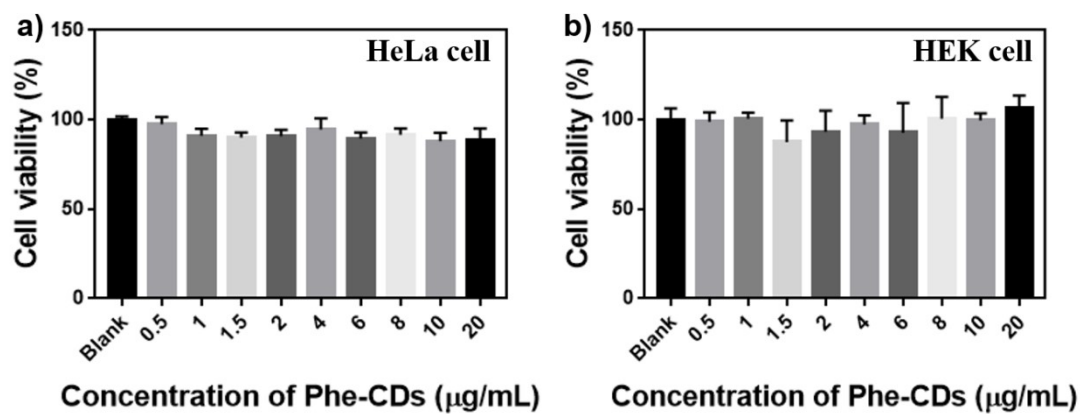

**Fig. S6** Cells viability of the Phe-CDs measured by using MTT assay. The error bars represent the mean errors from the results of 5 tests.

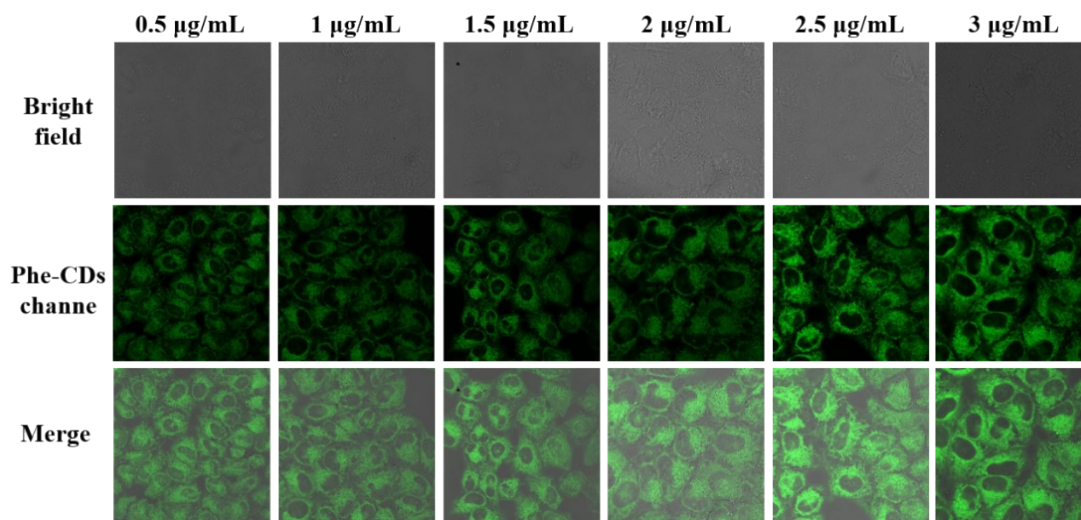

**Fig. S7** Confocal imaging of HeLa cell treated with different concentrations of the Phe-CDs.

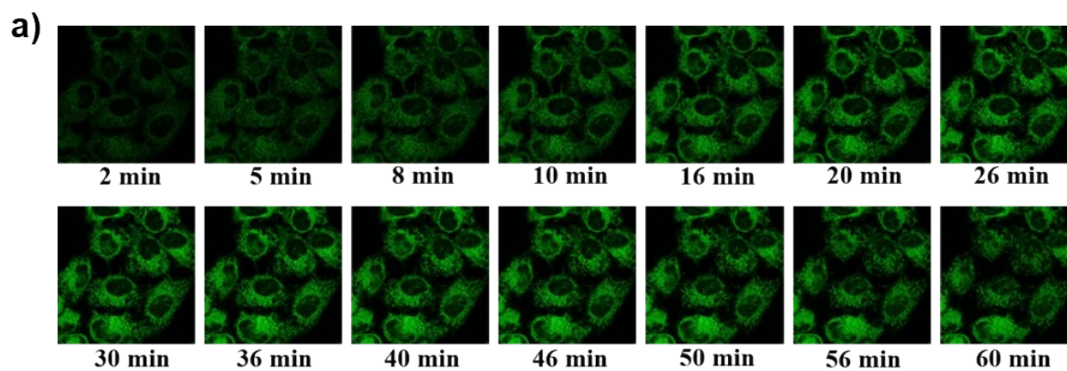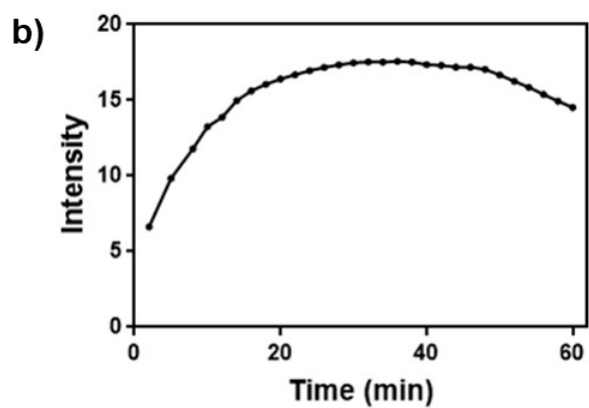

**Fig. S8** (a) Temporal imaging of Phe-CDs (2  $\mu\text{g/mL}$ ) in HeLa cells and (b) the corresponding fluorescence intensity data.

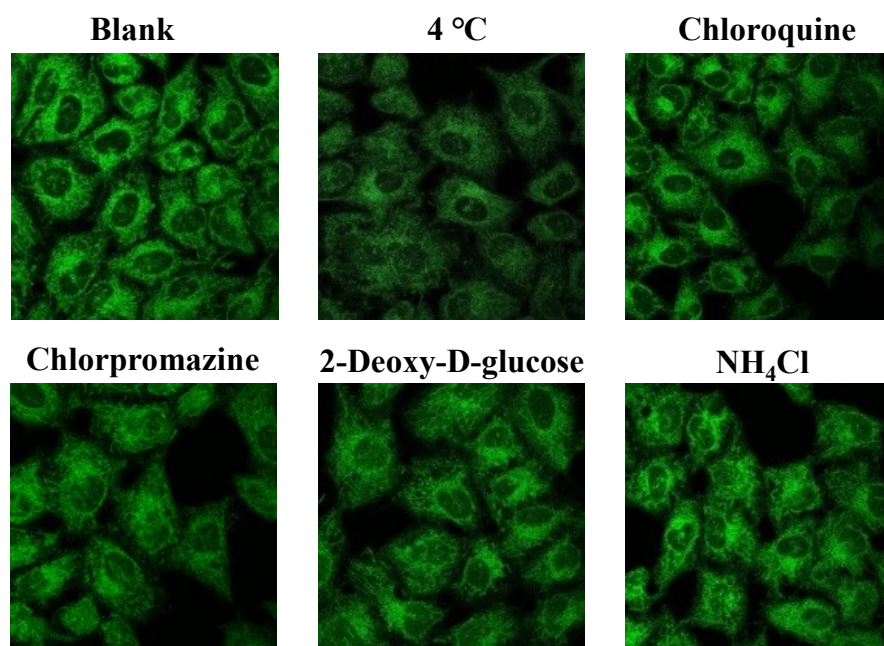

**Fig. S9** Fluorescent images of Phe-CDs in HeLa cells treated with different inhibitors.
